# Supplementary material
Source: publisher figshare collection journal article supplement (https://karger.figshare.com/articles/dataset/_/25243168)
Supplement: Supplementary file 1 [file 1]

Supplementary Table 1. Results of investigations.

| **Test** | **Results** | **Reference** |
| --- | --- | --- |
| APC resistance ratio | 2.8 | >2.2 |
| INR | 1.1 | 0.9-1.2 |
| APTT | 34.4 | 25.2-36.0 |
|  |  |  |
| **Anticardiolipin antibodies** |  |  |
| dRVVT | Negative |  |
| LsPTT | Negative |  |
| ACA-IgG | <2 | <19 |
| ACA-IgM | <2 | <19 |
| ACA INTERPRETATION | Negative |  |
| APA INTERPRETATION | Negative |  |
|  |  |  |
| Protein S Free Antigen | 0.99 | >0.55 |
| Protein C activity | 0.95 | >0.70 |
| Thrombosis Genetic screen | Negative |  |
| Antithrombin activity | 0.95 | >0.79 |
| Homocysteine | 5.8 | 5.1-15.4 |
| Ferritin | 61 | 5-272 |
| VDRL | Negative |  |
| ACE level | Normal | <40 ug/L |
|  |  |  |
| **Protein Electrophoresis** |  |  |
| Total Protein | 67 | 60-80 |
| Albumin | 42.8 | 36.0-51.0 |
| Alpha-1 globulin | 2.3 | 2.0-4.0 |
| Alpha-2 Globulin | 6.1 | 5.0-9.0 |
| Beta-1 Globulin | 3.7 | 3.0-6.0 |
| Beta-2 Globulin | 3.1 | 2.0-5.0 |
| Gamma Globulin | 9.0 | 6.0-16.0 |
